# Supplementary material for: Photocatalytic reduction of CO2 with H2O to CH4 over ultrathin SnNb2O6 2D nanosheets under visible light irradiation
Source: Royal Society of Chemistry journal article supplement (doi:10.1039/c5gc02308d), 2015-10-09
Supplement: c5gc02308d1.pdf [file c5gc02308d1.pdf]

Electronic Supplementary materials:

**Photocatalytic reduction of CO<sub>2</sub> with H<sub>2</sub>O to CH<sub>4</sub> over ultrathin  
SnNb<sub>2</sub>O<sub>6</sub> 2D nanosheets under visible light irradiation**

Shuying Zhu,<sup>a</sup> Shijing Liang,<sup>a,b,c\*</sup> Jinhong Bi,<sup>a,b</sup> Minghua Liu,<sup>a,b</sup> Limin Zhou,<sup>c</sup> Ling Wu<sup>a</sup> and Xuxu

Wang<sup>a\*</sup>

*a* State Key Laboratory of Photocatalysis on Energy and Environment, Fuzhou University, Fuzhou  
350002, P. R. China.

*b* Department of Environmental Science and Engineering, Fuzhou University, Minhou, Fujian,  
350108, P. R. China.

*c* Department of Mechanical Engineering, The Hong Kong Polytechnic University, Hung Hom,  
Kowloon, Hong Kong

---

\* Corresponding author:

Dr. Shijing Liang

Email: sjliang2011@gmail.com

Prof. Dr. Xuxu Wang

E-mail: xwang@fzu.edu.cn

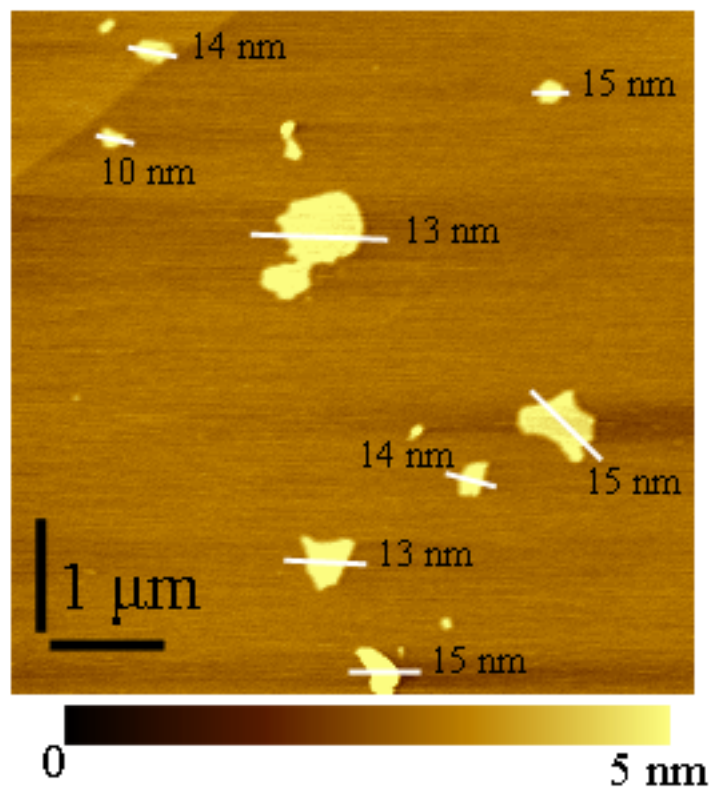

Fig. S1 AFM images of SN-28-4

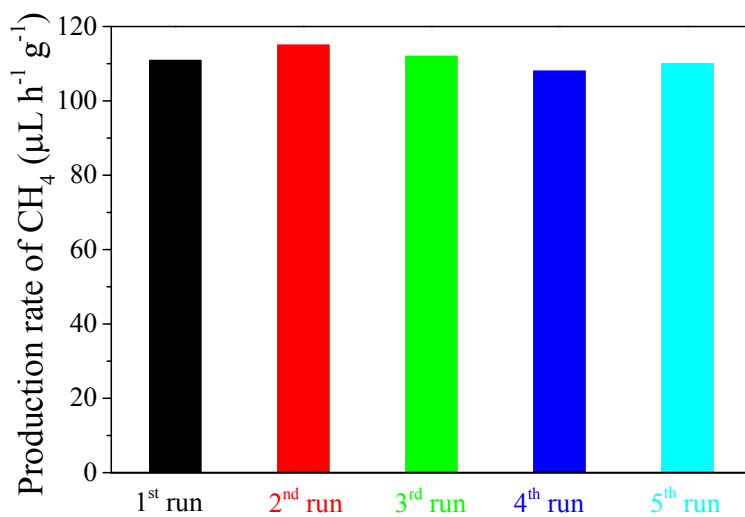

Fig. S2 The stability of photocatalytic activities of SN-48-2

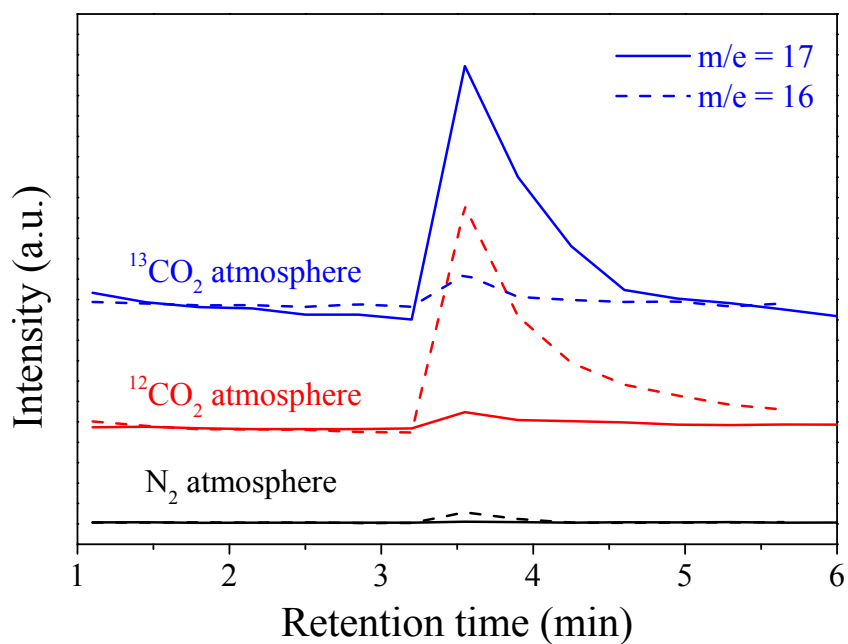

**Fig. S3** The mass chromatography spectra of  $^{13}\text{CH}_4$  ( $m/e = 17$ ) and  $^{12}\text{CH}_4$  ( $m/e = 16$ ) generated from SN-48-2 sample under  $\text{N}_2$ ,  $^{12}\text{CO}_2$ , and  $^{13}\text{CO}_2$  atmospheres.

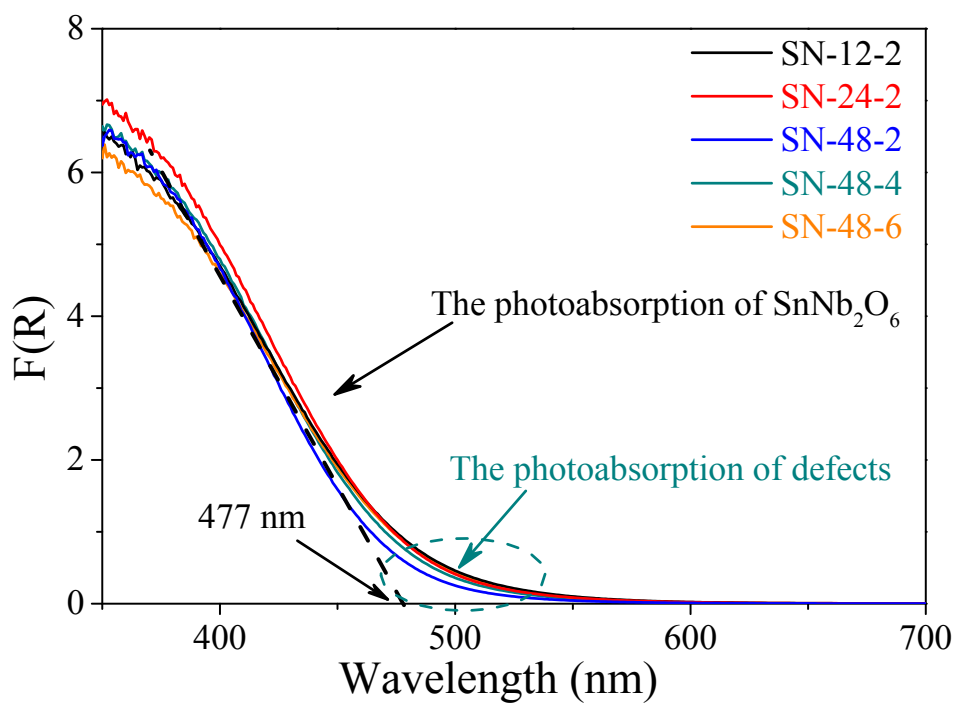

**Fig. S4** Enlarged DRS of the as-prepared samples

**Table S1** The other possible products of the as-prepared samples during the photocatalytic reduction of CO<sub>2</sub> (Unit:  $\mu\text{L h}^{-1} \text{g}^{-1}$ ).

| Sample  | CO   | H <sub>2</sub> | O <sub>2</sub> | Other hydrocarbon |
|---------|------|----------------|----------------|-------------------|
| SN-24-2 | 11.2 | 44.8           | 19.3           | ND <sup>a</sup>   |
| SN-48-2 | 9.0  | 17.9           | 45.4           | ND                |
| SN-48-4 | 9.0  | 9.0            | 22.7           | ND                |

<sup>a</sup> ND: No detected
